# Supplementary material for: Prp43 Bound at Different Sites on the Pre-rRNA Performs Distinct Functions in Ribosome Synthesis
Source: PubMed Central journal article supplement (PMC2806949; doi:10.1016/j.molcel.2009.09.039), 2009-11-25
Supplement: mmc1.pdf [file mmc1.pdf]

## Supplemental Data

### Prp43 Bound at Different Sites on the Pre-rRNA

### Performs Distinct Functions in Ribosome Synthesis

Markus T. Bohnsack, Roman Martin, Sander Granneman,  
Maïke Ruprecht, Enrico Schleiff, and David Tollervey

**Figure S1: Prp43 crosslinks to cellular RNA.** (A) Cells expressing HTP-tagged Prp43 or Rok1, or no tagged protein as control, were UV irradiated, tagged Prp43 and Rok1 were enriched on IgG sepharose (IgG eluate) and crosslinked RNA was trimmed and radiolabeled (labeled RNA). Proteins were separated by SDS PAGE and visualized by western blot (upper and middle panel) and crosslinked, radiolabelled RNA by autoradiography (lower panel). Crosslinked RNAs were then ligated to linkers, followed by RT-PCR and Solexa deep sequencing (B-E). Crosslinking with cells expressing Prp43-HTP was either performed *in vivo* (B) or *in vitro* (C). Untagged control cells were crosslinked *in vivo* (D). Identified sequences were sorted into categories shown in (E).

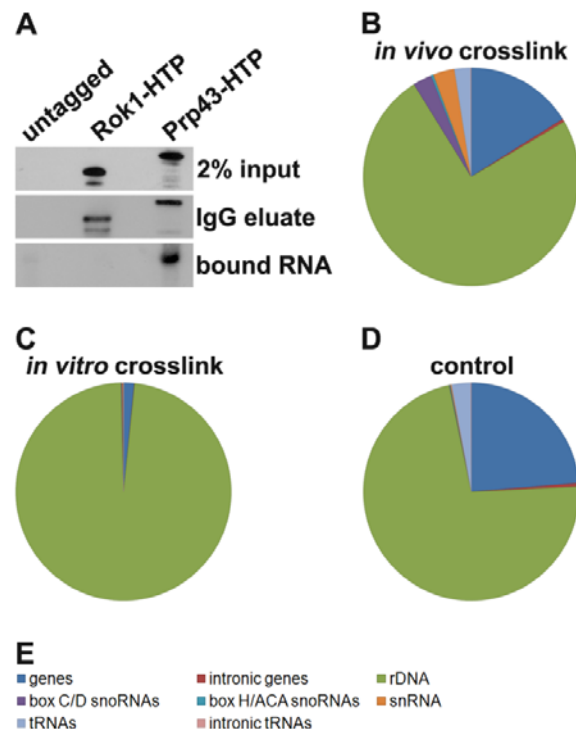

**Figure S2: Analysis of snoRNA levels before and after depletion of Prp43.**

Prp43 was depleted in the  $P_{tet}$ -*prp43* strain as described for Figure 4 and total RNA was isolated from cells followed by separation on a 10% acrylamide/8M urea gel and Northern transfer. snoRNAs were probed as indicated. No significant changes in the cellular levels of these snoRNAs were detected after Prp43 depletion.

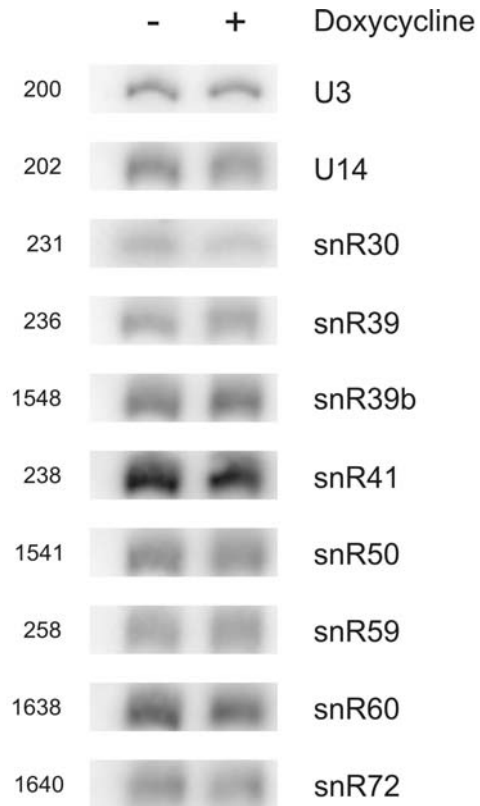

**Figure S3: Analysis of Prp43 wild type and mutants for growth complementation.**

A  $P_{tet}$ -*prp43* strain was transformed with plasmids expressing wild type Prp43 from its own promoter, the motif I mutant Prp43-T123A, motif III mutant Prp43-S247A, or with empty vector. (A, B) Growth was analyzed after spotting 10-fold dilutions of cultures on plates in the absence (permissive conditions; A) or presence (B) of doxycycline to repress chromosomal Prp43 expression. (C) Growth was followed in liquid culture for 24h after addition of doxycycline.

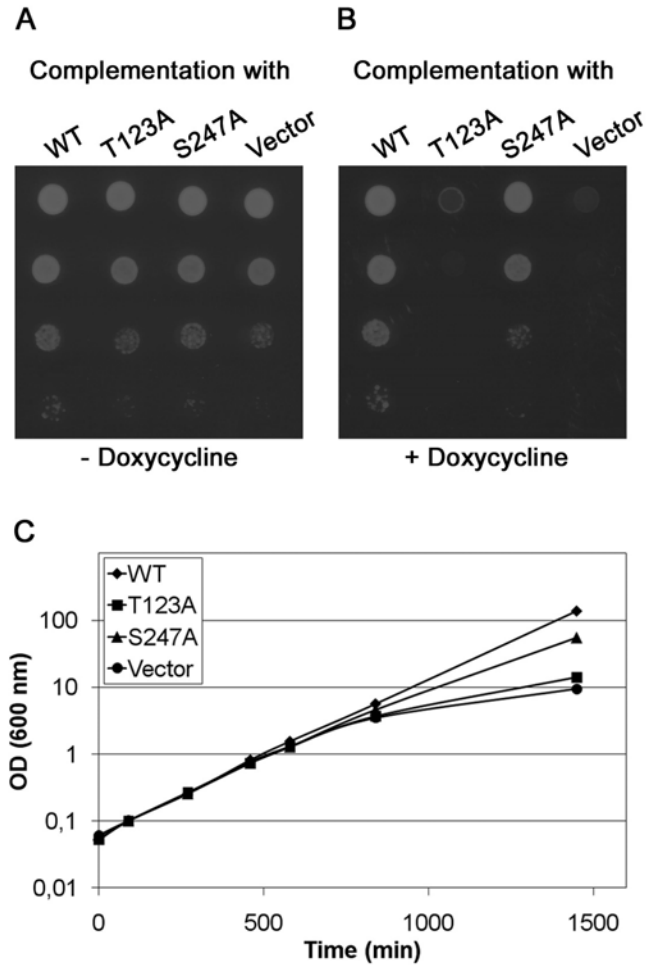

**Figure S4: Northern blot analysis of pre-rRNA and actin mRNA levels in Prp43 mutant strains.**

Genomic *PRP43* was depleted in cells expressing wildtype or mutant Prp43, or carrying empty vector. After 10 hours depletion cells were harvested, total RNA was isolated, separated on a 1.2% agarose gel followed by Northern transfer. The levels of several pre-ribosomal RNA intermediates and actin (*ACT1*) mRNA were probed as indicated (A). Levels of 27SB, 20S and actin mRNA were quantified (B). Expression of Prp43 mutants resulted in a slightly stronger reduction in pre-rRNA levels that in cells carrying the empty vector, whereas the opposite effect was observed on actin mRNA levels.

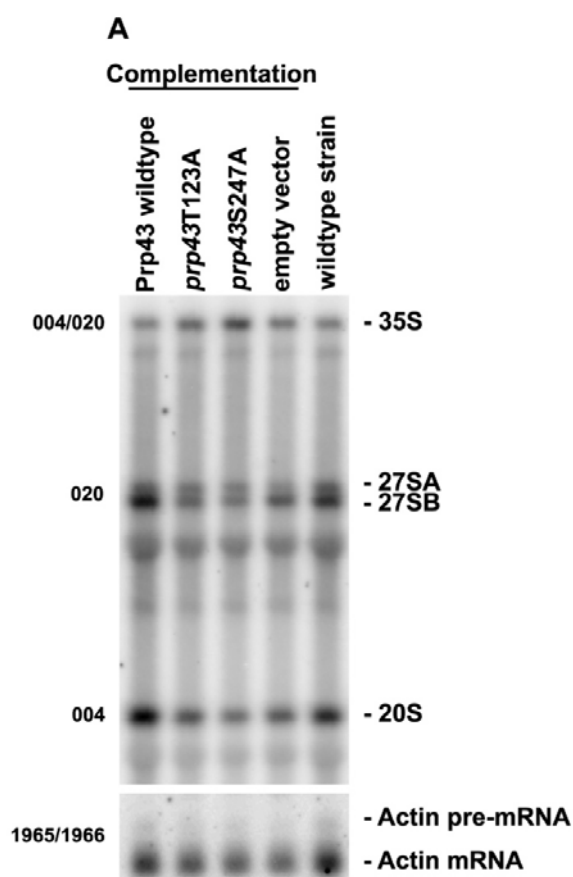

**B**

**Quantification**

|     |    |    |    |     |            |
|-----|----|----|----|-----|------------|
| 95  | 50 | 33 | 78 | 84  | 27SB       |
| 128 | 77 | 67 | 89 | 109 | 20S        |
| 70  | 56 | 51 | 45 | 71  | Actin mRNA |

**Table S1: Oligonucleotides used in this study.**

Sequences of the oligonucleotides used as probes for Northern hybridisation or cloning of the *PRP43* gene including 465 nucleotides upstream and 446 nucleotides downstream of the open reading frame are shown.

| No.  | Sequence                               | Use              |
|------|----------------------------------------|------------------|
| 004  | CGGTTTTAATTGTCCTA                      | pre-rRNA probe   |
| 020  | TGAGAAGGAAATGACGCT                     | pre-rRNA probe   |
| 200  | TTATGGGACTTGTT                         | U3a/b probe      |
| 202  | TCACTCAGACATCCTAGG                     | U14 probe        |
| 231  | CTAAGTTAAACTCGTCAACG                   | snR30 probe      |
| 236  | GGTGATAAGTTACGACAGC                    | snR39 probe      |
| 238  | GGTTGTGCGACATGTAGTTA                   | snR41 probe      |
| 258  | GGTGATTAAACGACAGCATTGTCAAAGACTAGTCGA   | snR59 probe      |
| 1396 | ATATTACTCGAGATGCCAAGGAAGCGTACTGAGTACAG | FP Prp43 cloning |
| 1397 | ATTATTGCGGCCGCTGTAGTTCAAATTAGATAGTGG   | RP Prp43 cloning |
| 1541 | GCTGCAAATTGCTACCTCTTTCA                | snR50 probe      |
| 1548 | TGCTAGTCACTTTTTGGAATGCC                | snR39b probe     |
| 1638 | CAATCAGTTGAACTATGCATCTTTGG             | snR60 probe      |
| 1640 | GATCAGACTGACGTGCAAATCATT               | snR72 probe      |
| 1965 | CAATAACCAAAGCAGCAAC                    | actin1 probe     |
| 1966 | ATACCGGCAGATTCCAAACCC                  | actin1 probe     |

**Table S2:**

To generate the snoRNA hit table, we used a perl script for information from the novoalign output file ([www.novocraft.com](http://www.novocraft.com); version 2.04) to count the number of hits for each gene of interest from the total number of mapped reads.

**Prp43 in vivo**

----box CD snoRNAs----

| snoRNA | hits  | perc_hits  |
|--------|-------|------------|
| snR128 | 817   | 0.00084111 |
| snR13  | 232   | 0.00023885 |
| snR17a | 715   | 0.0007361  |
| snR17b | 369   | 0.00037989 |
| snR18  | 37    | 3.81E-05   |
| snR190 | 267   | 0.00027488 |
| snR24  | 406   | 0.00041798 |
| snR38  | 62    | 6.38E-05   |
| snR39  | 116   | 0.00011942 |
| snR39B | 136   | 0.00014001 |
| snR4   | 219   | 0.00022546 |
| snR40  | 664   | 0.0006836  |
| snR41  | 45    | 4.63E-05   |
| snR45  | 271   | 0.000279   |
| snR47  | 403   | 0.00041489 |
| snR48  | 0     | 0          |
| snR50  | 83    | 8.54E-05   |
| snR51  | 15582 | 0.01604186 |
| snR52  | 663   | 0.00068257 |
| snR53  | 13    | 1.34E-05   |
| snR54  | 207   | 0.00021311 |
| snR55  | 176   | 0.00018119 |
| snR56  | 113   | 0.00011633 |
| snR57  | 372   | 0.00038298 |
| snR58  | 40    | 4.12E-05   |
| snR59  | 250   | 0.00025738 |
| snR60  | 1419  | 0.00146088 |
| snR61  | 556   | 0.00057241 |
| snR62  | 1     | 1.03E-06   |
| snR63  | 282   | 0.00029032 |
| snR64  | 383   | 0.0003943  |
| snR65  | 0     | 0          |
| snR66  | 18    | 1.85E-05   |
| snR67  | 314   | 0.00032327 |
| snR68  | 89    | 9.16E-05   |
| snR69  | 155   | 0.00015957 |
| snR70  | 130   | 0.00013384 |
| snR71  | 143   | 0.00014722 |
| snR72  | 2231  | 0.00229684 |
| snR73  | 452   | 0.00046534 |
| snR74  | 586   | 0.00060329 |
| snR75  | 0     | 0          |
| snR76  | 107   | 0.00011016 |
| snR77  | 127   | 0.00013075 |
| snR78  | 0     | 0          |
| snR79  | 718   | 0.00073919 |
| snR87  | 0     | 0          |

**Control**

----box CD snoRNAs----

| snoRNA | hits | perc_hits  |
|--------|------|------------|
| snR128 | 224  | 0.00047194 |
| snR13  | 160  | 0.0003371  |
| snR17a | 0    | 0          |
| snR17b | 0    | 0          |
| snR18  | 0    | 0          |
| snR190 | 0    | 0          |
| snR24  | 3    | 6.32E-06   |
| snR38  | 0    | 0          |
| snR39  | 0    | 0          |
| snR39B | 0    | 0          |
| snR4   | 0    | 0          |
| snR40  | 0    | 0          |
| snR41  | 0    | 0          |
| snR45  | 0    | 0          |
| snR47  | 0    | 0          |
| snR48  | 0    | 0          |
| snR50  | 0    | 0          |
| snR51  | 0    | 0          |
| snR52  | 0    | 0          |
| snR53  | 0    | 0          |
| snR54  | 0    | 0          |
| snR55  | 0    | 0          |
| snR56  | 0    | 0          |
| snR57  | 0    | 0          |
| snR58  | 67   | 0.00014116 |
| snR59  | 398  | 0.00083853 |
| snR60  | 31   | 6.53E-05   |
| snR61  | 0    | 0          |
| snR62  | 0    | 0          |
| snR63  | 0    | 0          |
| snR64  | 0    | 0          |
| snR65  | 0    | 0          |
| snR66  | 0    | 0          |
| snR67  | 0    | 0          |
| snR68  | 0    | 0          |
| snR69  | 0    | 0          |
| snR70  | 0    | 0          |
| snR71  | 0    | 0          |
| snR72  | 0    | 0          |
| snR73  | 0    | 0          |
| snR74  | 0    | 0          |
| snR75  | 0    | 0          |
| snR76  | 0    | 0          |
| snR77  | 0    | 0          |
| snR78  | 0    | 0          |
| snR79  | 0    | 0          |
| snR87  | 0    | 0          |

**Prp43 in vitro**

----box CD snoRNAs----

| snoRNA | hits | perc_hits  |
|--------|------|------------|
| snR128 | 155  | 9.41E-05   |
| snR13  | 10   | 6.07E-06   |
| snR17a | 254  | 0.00015415 |
| snR17b | 197  | 0.00011955 |
| snR18  | 0    | 0          |
| snR190 | 0    | 0          |
| snR24  | 28   | 1.70E-05   |
| snR38  | 0    | 0          |
| snR39  | 0    | 0          |
| snR39B | 0    | 0          |
| snR4   | 67   | 4.07E-05   |
| snR40  | 47   | 2.85E-05   |
| snR41  | 5    | 3.03E-06   |
| snR45  | 9    | 5.46E-06   |
| snR47  | 7    | 4.25E-06   |
| snR48  | 0    | 0          |
| snR50  | 0    | 0          |
| snR51  | 90   | 5.46E-05   |
| snR52  | 32   | 1.94E-05   |
| snR53  | 19   | 1.15E-05   |
| snR54  | 0    | 0          |
| snR55  | 0    | 0          |
| snR56  | 0    | 0          |
| snR57  | 19   | 1.15E-05   |
| snR58  | 15   | 9.10E-06   |
| snR59  | 10   | 6.07E-06   |
| snR60  | 18   | 1.09E-05   |
| snR61  | 115  | 6.98E-05   |
| snR62  | 3    | 1.82E-06   |
| snR63  | 0    | 0          |
| snR64  | 7    | 4.25E-06   |
| snR65  | 0    | 0          |
| snR66  | 0    | 0          |
| snR67  | 36   | 2.18E-05   |
| snR68  | 0    | 0          |
| snR69  | 0    | 0          |
| snR70  | 0    | 0          |
| snR71  | 57   | 3.46E-05   |
| snR72  | 198  | 0.00012016 |
| snR73  | 73   | 4.43E-05   |
| snR74  | 25   | 1.52E-05   |
| snR75  | 0    | 0          |
| snR76  | 232  | 0.0001408  |
| snR77  | 0    | 0          |
| snR78  | 0    | 0          |
| snR79  | 14   | 8.50E-06   |
| snR87  | 0    | 0          |

----box HACA snoRNAs----

| snoRNA | hits | perc_hits  |
|--------|------|------------|
| snR10  | 554  | 0.00057035 |
| snR11  | 298  | 0.00030679 |
| snR161 | 32   | 3.29E-05   |
| snR189 | 10   | 1.03E-05   |
| snR191 | 99   | 0.00010192 |
| snR3   | 68   | 7.00E-05   |
| snR30  | 990  | 0.00101922 |
| snR31  | 135  | 0.00013898 |
| snR33  | 494  | 0.00050858 |
| snR34  | 0    | 0          |
| snR35  | 196  | 0.00020178 |
| snR36  | 11   | 1.13E-05   |
| snR37  | 360  | 0.00037062 |
| snR42  | 96   | 9.88E-05   |
| snR43  | 2    | 2.06E-06   |
| snR44  | 16   | 1.65E-05   |
| snR46  | 0    | 0          |
| snR49  | 3    | 3.09E-06   |
| snR5   | 105  | 0.0001081  |
| snR8   | 180  | 0.00018531 |
| snR80  | 0    | 0          |
| snR81  | 1    | 1.03E-06   |
| snR82  | 234  | 0.00024091 |
| snR83  | 453  | 0.00046637 |
| snR84  | 40   | 4.12E-05   |
| snR85  | 139  | 0.0001431  |
| snR86  | 70   | 7.21E-05   |
| snR9   | 26   | 2.68E-05   |

----box HACA snoRNAs----

| snoRNA | hits | perc_hits  |
|--------|------|------------|
| snR10  | 0    | 0          |
| snR11  | 0    | 0          |
| snR161 | 0    | 0          |
| snR189 | 0    | 0          |
| snR191 | 0    | 0          |
| snR3   | 4    | 8.43E-06   |
| snR30  | 498  | 0.00104922 |
| snR31  | 0    | 0          |
| snR33  | 22   | 4.64E-05   |
| snR34  | 1    | 2.11E-06   |
| snR35  | 0    | 0          |
| snR36  | 0    | 0          |
| snR37  | 0    | 0          |
| snR42  | 0    | 0          |
| snR43  | 0    | 0          |
| snR44  | 0    | 0          |
| snR46  | 0    | 0          |
| snR49  | 0    | 0          |
| snR5   | 0    | 0          |
| snR8   | 1    | 2.11E-06   |
| snR80  | 0    | 0          |
| snR81  | 0    | 0          |
| snR82  | 1    | 2.11E-06   |
| snR83  | 86   | 0.00018119 |
| snR84  | 0    | 0          |
| snR85  | 0    | 0          |
| snR86  | 0    | 0          |
| snR9   | 0    | 0          |

----box HACA snoRNAs----

| snoRNA | hits | perc_hits  |
|--------|------|------------|
| snR10  | 245  | 0.00014868 |
| snR11  | 0    | 0          |
| snR161 | 0    | 0          |
| snR189 | 0    | 0          |
| snR191 | 0    | 0          |
| snR3   | 1    | 6.07E-07   |
| snR30  | 118  | 7.16E-05   |
| snR31  | 0    | 0          |
| snR33  | 0    | 0          |
| snR34  | 0    | 0          |
| snR35  | 91   | 5.52E-05   |
| snR36  | 0    | 0          |
| snR37  | 13   | 7.89E-06   |
| snR42  | 0    | 0          |
| snR43  | 0    | 0          |
| snR44  | 0    | 0          |
| snR46  | 0    | 0          |
| snR49  | 0    | 0          |
| snR5   | 23   | 1.40E-05   |
| snR8   | 0    | 0          |
| snR80  | 15   | 9.10E-06   |
| snR81  | 0    | 0          |
| snR82  | 0    | 0          |
| snR83  | 26   | 1.58E-05   |
| snR84  | 0    | 0          |
| snR85  | 0    | 0          |
| snR86  | 32   | 1.94E-05   |
| snR9   | 38   | 2.31E-05   |

**Bohnsack *et al.*, legend to supplemental sequence alignments**

Alignments were generated using a perl script that uses the information from the novoalign output file ([www.novocraft.com](http://www.novocraft.com); version 2.04) to mark the location of the deletions and substitutions in the reads and to align them to the reference sequence. Each alignment file contains a maximum of 200 nucleotide sequences which the program randomly selected from the novoalign output file. Substitutions in sequences are indicated in lower case, whereas deletions are indicated as gaps. Alignments of snoRNA hits for snR51, snR60 and snR72 and alignments with sequences around the 5 major peaks on the rDNA found after *in vivo* or *in vitro* cross-linking are shown.





|                               |                                  |
|-------------------------------|----------------------------------|
| @HWI-EAS293:2:1:533:661#0/1   | -----AAAAAAGCTGATTTAATGACTCTGAAA |
| @HWI-EAS293:2:1:610:1907#0/1  | -----AAAAAAGCTGATTTAATGACTCTGAAA |
| @HWI-EAS293:2:1:614:2008#0/1  | -----AAAAAAGCTGATTTAATGACTCTGAAA |
| @HWI-EAS293:2:1:633:462#0/1   | -----AAAAAAGCTGATTTAATGACTCTGAAA |
| @HWI-EAS293:2:1:647:1609#0/1  | -----AAAAAAGCTGATTTAATGACTCTGAAA |
| @HWI-EAS293:2:1:658:305#0/1   | -----AAAAAAGCTGATTTAATGACTCTGAAA |
| @HWI-EAS293:2:1:722:1174#0/1  | -----AAAAAAGCTGATTTAATGACTCTGAAA |
| @HWI-EAS293:2:1:754:71#0/1    | -----AAAAAAGCTGATTTAATGACTCTGAAA |
| @HWI-EAS293:2:1:793:623#0/1   | -----AAAAAAGCTGATTTAATGACTCTGAAA |
| @HWI-EAS293:2:1:837:867#0/1   | -----AAAAAAGCTGATTTAATGACTCTGAAA |
| @HWI-EAS293:2:1:856:1712#0/1  | -----AAAAAAGCTGATTTAATGACTCTGAAA |
| @HWI-EAS293:2:1:888:637#0/1   | -----AAAAAAGCTGATTTAATGACTCTGAAA |
| @HWI-EAS293:2:1:893:1910#0/1  | -----AAAAAAGCTGATTTAATGACTCTGAAA |
| @HWI-EAS293:2:1:915:310#0/1   | -----AAAAAAGCTGATTTAATGACTCTGAAA |
| @HWI-EAS293:2:1:932:287#0/1   | -----AAAAAAGCTGATTTAATGACTCTGAAA |
| @HWI-EAS293:2:1:977:1389#0/1  | -----AAAAAAGCTGATTTAATGACTCTGAAA |
| @HWI-EAS293:2:1:1043:400#0/1  | -----AAAAAAGCTGATTTAATGACTCTGAAA |
| @HWI-EAS293:2:1:1060:539#0/1  | -----AAAAAAGCTGATTTAATGACTCTGAAA |
| @HWI-EAS293:2:1:1077:1148#0/1 | -----AAAAAAGCTGATTTAATGACTCTGAAA |
| @HWI-EAS293:2:1:1083:657#0/1  | -----AAAAAAGCTGATTTAATGACTCTGAAA |
| @HWI-EAS293:2:1:1088:458#0/1  | -----AAAAAAGCTGATTTAATGACTCTGAAA |
| @HWI-EAS293:2:1:1112:889#0/1  | -----AAAAAAGCTGATTTAATGACTCTGAAA |
| @HWI-EAS293:2:1:1117:151#0/1  | -----AAAAAAGCTGATTTAATGACTCTGAAA |
| @HWI-EAS293:2:1:1134:697#0/1  | -----AAAAAAGCTGATTTAATGACTCTGAAA |
| @HWI-EAS293:2:1:1178:1194#0/1 | -----AAAAAAGCTGATTTAATGACTCTGAAA |
| @HWI-EAS293:2:1:1278:1381#0/1 | -----AAAAAAGCTGATTTAATGACTCTGAAA |
| @HWI-EAS293:2:1:1280:345#0/1  | -----AAAAAAGCTGATTTAATGACTCTGAAA |
| @HWI-EAS293:2:1:1317:1179#0/1 | -----AAAAAAGCTGATTTAATGACTCTGAAA |
| @HWI-EAS293:2:1:1335:515#0/1  | -----AAAAAAGCTGATTTAATGACTCTGAAA |
| @HWI-EAS293:2:1:1366:1352#0/1 | -----AAAAAAGCTGATTTAATGACTCTGAAA |
| @HWI-EAS293:2:1:1392:1487#0/1 | -----AAAAAAGCTGATTTAATGACTCTGAAA |
| @HWI-EAS293:2:1:1400:1320#0/1 | -----AAAAAAGCTGATTTAATGACTCTGAAA |
| @HWI-EAS293:2:1:1447:1848#0/1 | -----AAAAAAGCTGATTTAATGACTCTGAAA |
| @HWI-EAS293:2:1:1464:1816#0/1 | -----AAAAAAGCTGATTTAATGACTCTGAAA |
| @HWI-EAS293:2:1:1466:1506#0/1 | -----AAAAAAGCTGATTTAATGACTCTGAAA |
| @HWI-EAS293:2:1:1516:1152#0/1 | -----AAAAAAGCTGATTTAATGACTCTGAAA |
| @HWI-EAS293:2:1:1579:603#0/1  | -----AAAAAAGCTGATTTAATGACTCTGAAA |
| @HWI-EAS293:2:1:1601:386#0/1  | -----AAAAAAGCTGATTTAATGACTCTGAAA |
| @HWI-EAS293:2:1:1671:964#0/1  | -----AAAAAAGCTGATTTAATGACTCTGAAA |
| @HWI-EAS293:2:1:1705:260#0/1  | -----AAAAAAGCTGATTTAATGACTCTGAAA |
| @HWI-EAS293:2:1:18:696#0/1    | -----AAAAAAGCTGATTTAATGACTCTGAAA |
| @HWI-EAS293:2:1:235:957#0/1   | -----AAAAAAGCTGATTTAATGACTCTGAAA |
| @HWI-EAS293:2:1:352:1153#0/1  | -----AAAAAAGCTGATTTAATGACTCTGAAA |
| @HWI-EAS293:2:1:399:1473#0/1  | -----AAAAAAGCTGATTTAATGACTCTGAAA |
| @HWI-EAS293:2:1:400:1615#0/1  | -----AAAAAAGCTGATTTAATGACTCTGAAA |
| @HWI-EAS293:2:1:569:1692#0/1  | -----AAAAAAGCTGATTTAATGACTCTGAAA |
| @HWI-EAS293:2:1:627:375#0/1   | -----AAAAAAGCTGATTTAATGACTCTGAAA |
| @HWI-EAS293:2:1:690:1384#0/1  | -----AAAAAAGCTGATTTAATGACTCTGAAA |
| @HWI-EAS293:2:1:699:158#0/1   | -----AAAAAAGCTGATTTAATGACTCTGAAA |
| @HWI-EAS293:2:1:705:1173#0/1  | -----AAAAAAGCTGATTTAATGACTCTGAAA |
| @HWI-EAS293:2:1:808:311#0/1   | -----AAAAAAGCTGATTTAATGACTCTGAAA |
| @HWI-EAS293:2:1:976:1266#0/1  | -----AAAAAAGCTGATTTAATGACTCTGAAA |
| @HWI-EAS293:2:1:1034:379#0/1  | -----AAAAAAGCTGATTTAATGACTCTGAAA |
| @HWI-EAS293:2:1:1077:358#0/1  | -----AAAAAAGCTGATTTAATGACTCTGAAA |
| @HWI-EAS293:2:1:1103:184#0/1  | -----AAAAAAGCTGATTTAATGACTCTGAAA |
| @HWI-EAS293:2:1:1209:542#0/1  | -----AAAAAAGCTGATTTAATGACTCTGAAA |
| @HWI-EAS293:2:1:1275:987#0/1  | -----AAAAAAGCTGATTTAATGACTCTGAAA |
| @HWI-EAS293:2:1:1328:1541#0/1 | -----AAAAAAGCTGATTTAATGACTCTGAAA |
| @HWI-EAS293:2:1:1385:1670#0/1 | -----AAAAAAGCTGATTTAATGACTCTGAAA |
| @HWI-EAS293:2:1:1465:1258#0/1 | -----AAAAAAGCTGATTTAATGACTCTGAAA |
| @HWI-EAS293:2:1:1483:1878#0/1 | -----AAAAAAGCTGATTTAATGACTCTGAAA |
| @HWI-EAS293:2:1:1560:1802#0/1 | -----AAAAAAGCTGATTTAATGACTCTGAAA |
| @HWI-EAS293:2:1:1610:851#0/1  | -----AAAAAAGCTGATTTAATGACTCTGAAA |
| @HWI-EAS293:2:1:1669:444#0/1  | -----AAAAAAGCTGATTTAATGACTCTGAAA |
| @HWI-EAS293:2:1:1691:906#0/1  | -----AAAAAAGCTGATTTAATGACTCTGAAA |
| @HWI-EAS293:2:1:1700:1522#0/1 | -----AAAAAAGCTGATTTAATGACTCTGAAA |
| @HWI-EAS293:2:1:1711:1875#0/1 | -----AAAAAAGCTGATTTAATGACTCTGAAA |
| @HWI-EAS293:2:1:196:316#0/1   | -----AAAAAAGCTGATTTAATGACTCTGAAA |
| @HWI-EAS293:2:1:1010:1300#0/1 | -----AAAAAAGCTGATTTAATGACTCTGAAA |
| @HWI-EAS293:2:1:159:66#0/1    | -----AAAAAAGCTGATTTAATGACTCTGAAA |
| @HWI-EAS293:2:1:1013:1838#0/1 | -----AAAAAAGCTGATTTAATGACTCTGAAA |
| @HWI-EAS293:2:1:1099:1047#0/1 | -----AAAAAAGCTGATTTAATGACTCTGAAA |





```

1
snr72
@HWI-EAS293:2:4:1475:1992#0/1-----GTGATGTGATGACAACTTCTGAGCTATATATTTCTTGAGAAATCAATGAAGAAAACGTCTCAATCAATGATTGGCAGCTGAGTCTGATCACAAGC
@HWI-EAS293:2:7:210:1603#0/1-----GAGCTATATATTTCTTGAGAAC
@HWI-EAS293:2:9:939:1164#0/1-----GAGCTATATATTTCTTGAGAAC
@HWI-EAS293:2:13:409:1113#0/1-----GAGCTATATATTTCTTGAGAAC
@HWI-EAS293:2:1:1349:1929#0/1-----TATATATTTCTTGAGAAC
@HWI-EAS293:2:2:1069:932#0/1-----TATATATTTCTTGAGAAC
@HWI-EAS293:2:3:1333:901#0/1-----TATATATTTCTTGAGAAC
@HWI-EAS293:2:5:175:1922#0/1-----TATATATTTCTTGAGAAC
@HWI-EAS293:2:6:224:1158#0/1-----TATATATTTCTTGAGAAC
@HWI-EAS293:2:6:449:1925#0/1-----TATATATTTCTTGAGAAC
@HWI-EAS293:2:9:1365:312#0/1-----TATATATTTCTTGAGAAC
@HWI-EAS293:2:10:408:1055#0/1-----TATATATTTCTTGAGAAC
@HWI-EAS293:2:12:395:266#0/1-----TATATATTTCTTGAGAAC
@HWI-EAS293:2:12:470:2013#0/1-----TATATATTTCTTGAGAAC
@HWI-EAS293:2:13:635:563#0/1-----TATATATTTCTTGAGAAC
@HWI-EAS293:2:16:677:652#0/1-----TATATATTTCTTGAGAAC
@HWI-EAS293:2:16:1224:123#0/1-----TATATATTTCTTGAGAAC
@HWI-EAS293:2:19:105:1992#0/1-----TATATATTTCTTGAGAAC
@HWI-EAS293:2:8:1080:1918#0/1-----ATCAATGAAGAAAACGTCTCAATCAATGATTGGCAGCTGAGTCTGATCACA
@HWI-EAS293:2:10:83:1966#0/1-----ATCAATGAAGAAAACGTCTCAATCAATGATTGGCAGCTGAGTCTGATCACA
@HWI-EAS293:2:4:36:1329#0/1-----GCTCATCAATGATTGGCAGCTGAGTCTGATCACA
@HWI-EAS293:2:4:374:389#0/1-----GCTCATCAATGATTGGCAGCTGAGTCTGATCACA
@HWI-EAS293:2:6:315:610#0/1-----GCTCATCAATGATTGGCAGCTGAGTCTGATCACA
@HWI-EAS293:2:7:141:1260#0/1-----GCTCATCAATGATTGGCAGCTGAGTCTGATCACA
@HWI-EAS293:2:8:863:1877#0/1-----GCTCATCAATGATTGGCAGCTGAGTCTGATCACA
@HWI-EAS293:2:9:25:1329#0/1-----GCTCATCAATGATTGGCAGCTGAGTCTGATCACA
@HWI-EAS293:2:9:1322:1523#0/1-----GCTCATCAATGATTGGCAGCTGAGTCTGATCACA
@HWI-EAS293:2:12:105:1267#0/1-----GCTCATCAATGATTGGCAGCTGAGTCTGATCACA
@HWI-EAS293:2:17:1604:513#0/1-----GCTCATCAATGATTGGCAGCTGAGTCTGATCACA
@HWI-EAS293:2:18:110:809#0/1-----GCTCATCAATGATTGGCAGCTGAGTCTGATCACA
@HWI-EAS293:2:1:246:1693#0/1-----ATCAATGATTGGCAGCTGAGTCTGATCACA
@HWI-EAS293:2:1:1466:1752#0/1-----ATCAATGATTGGCAGCTGAGTCTGATCACA
@HWI-EAS293:2:1:1592:510#0/1-----ATCAATGATTGGCAGCTGAGTCTGATCACA
@HWI-EAS293:2:1:1646:1326#0/1-----ATCAATGATTGGCAGCTGAGTCTGATCACA
@HWI-EAS293:2:1:1665:933#0/1-----ATCAATGATTGGCAGCTGAGTCTGATCACA
@HWI-EAS293:2:1:1770:1007#0/1-----ATCAATGATTGGCAGCTGAGTCTGATCACA
@HWI-EAS293:2:1:702:1478#0/1-----ATCAATGATTGGCAGCTGAGTCTGATCACA
@HWI-EAS293:2:2:1201:562#0/1-----ATCAATGATTGGCAGCTGAGTCTGATCACA
@HWI-EAS293:2:2:1663:298#0/1-----ATCAATGATTGGCAGCTGAGTCTGATCACA
@HWI-EAS293:2:3:929:1185#0/1-----ATCAATGATTGGCAGCTGAGTCTGATCACA
@HWI-EAS293:2:3:941:1390#0/1-----ATCAATGATTGGCAGCTGAGTCTGATCACA
@HWI-EAS293:2:3:1173:1442#0/1-----ATCAATGATTGGCAGCTGAGTCTGATCACA
@HWI-EAS293:2:3:1564:614#0/1-----ATCAATGATTGGCAGCTGAGTCTGATCACA
@HWI-EAS293:2:4:411:821#0/1-----ATCAATGATTGGCAGCTGAGTCTGATCACA
@HWI-EAS293:2:4:459:1920#0/1-----ATCAATGATTGGCAGCTGAGTCTGATCACA
@HWI-EAS293:2:4:1593:711#0/1-----ATCAATGATTGGCAGCTGAGTCTGATCACA
@HWI-EAS293:2:4:1164:461#0/1-----ATCAATGATTGGCAGCTGAGTCTGATCACA
@HWI-EAS293:2:5:106:33#0/1-----ATCAATGATTGGCAGCTGAGTCTGATCACA
@HWI-EAS293:2:5:293:1583#0/1-----ATCAATGATTGGCAGCTGAGTCTGATCACA
@HWI-EAS293:2:5:583:117#0/1-----ATCAATGATTGGCAGCTGAGTCTGATCACA
@HWI-EAS293:2:5:735:1971#0/1-----ATCAATGATTGGCAGCTGAGTCTGATCACA
@HWI-EAS293:2:5:854:1838#0/1-----ATCAATGATTGGCAGCTGAGTCTGATCACA
@HWI-EAS293:2:5:1018:44#0/1-----ATCAATGATTGGCAGCTGAGTCTGATCACA
@HWI-EAS293:2:6:479:484#0/1-----ATCAATGATTGGCAGCTGAGTCTGATCACA
@HWI-EAS293:2:6:1498:1918#0/1-----ATCAATGATTGGCAGCTGAGTCTGATCACA
@HWI-EAS293:2:7:261:1961#0/1-----ATCAATGATTGGCAGCTGAGTCTGATCACA
@HWI-EAS293:2:7:870:1953#0/1-----ATCAATGATTGGCAGCTGAGTCTGATCACA
@HWI-EAS293:2:7:881:1534#0/1-----ATCAATGATTGGCAGCTGAGTCTGATCACA
@HWI-EAS293:2:7:1218:1345#0/1-----ATCAATGATTGGCAGCTGAGTCTGATCACA
@HWI-EAS293:2:7:1272:95#0/1-----ATCAATGATTGGCAGCTGAGTCTGATCACA
@HWI-EAS293:2:7:1338:725#0/1-----ATCAATGATTGGCAGCTGAGTCTGATCACA
@HWI-EAS293:2:7:1400:236#0/1-----ATCAATGATTGGCAGCTGAGTCTGATCACA
@HWI-EAS293:2:7:1535:629#0/1-----ATCAATGATTGGCAGCTGAGTCTGATCACA
@HWI-EAS293:2:8:152:158#0/1-----ATCAATGATTGGCAGCTGAGTCTGATCACA
@HWI-EAS293:2:8:812:684#0/1-----ATCAATGATTGGCAGCTGAGTCTGATCACA
@HWI-EAS293:2:8:1048:1512#0/1-----ATCAATGATTGGCAGCTGAGTCTGATCACA
@HWI-EAS293:2:8:1456:526#0/1-----ATCAATGATTGGCAGCTGAGTCTGATCACA
@HWI-EAS293:2:9:1179:1104#0/1-----ATCAATGATTGGCAGCTGAGTCTGATCACA
@HWI-EAS293:2:9:1276:1876#0/1-----ATCAATGATTGGCAGCTGAGTCTGATCACA
@HWI-EAS293:2:9:1409:100#0/1-----ATCAATGATTGGCAGCTGAGTCTGATCACA
@HWI-EAS293:2:9:1604:1672#0/1-----ATCAATGATTGGCAGCTGAGTCTGATCACA
@HWI-EAS293:2:10:777:552#0/1-----ATCAATGATTGGCAGCTGAGTCTGATCACA
@HWI-EAS293:2:10:502:1702#0/1-----ATCAATGATTGGCAGCTGAGTCTGATCACA
@HWI-EAS293:2:10:1721:826#0/1-----ATCAATGATTGGCAGCTGAGTCTGATCACA
@HWI-EAS293:2:12:414:1211#0/1-----ATCAATGATTGGCAGCTGAGTCTGATCACA
@HWI-EAS293:2:12:625:1427#0/1-----ATCAATGATTGGCAGCTGAGTCTGATCACA
@HWI-EAS293:2:12:916:1788#0/1-----ATCAATGATTGGCAGCTGAGTCTGATCACA
@HWI-EAS293:2:12:1082:1165#0/1-----ATCAATGATTGGCAGCTGAGTCTGATCACA
@HWI-EAS293:2:12:1414:1138#0/1-----ATCAATGATTGGCAGCTGAGTCTGATCACA
@HWI-EAS293:2:13:902:781#0/1-----ATCAATGATTGGCAGCTGAGTCTGATCACA
@HWI-EAS293:2:13:1031:474#0/1-----ATCAATGATTGGCAGCTGAGTCTGATCACA
@HWI-EAS293:2:14:509:978#0/1-----ATCAATGATTGGCAGCTGAGTCTGATCACA
@HWI-EAS293:2:14:317:1916#0/1-----ATCAATGATTGGCAGCTGAGTCTGATCACA
@HWI-EAS293:2:14:627:1222#0/1-----ATCAATGATTGGCAGCTGAGTCTGATCACA
@HWI-EAS293:2:14:1010:307#0/1-----ATCAATGATTGGCAGCTGAGTCTGATCACA
@HWI-EAS293:2:15:1131:1117#0/1-----ATCAATGATTGGCAGCTGAGTCTGATCACA
@HWI-EAS293:2:15:1213:433#0/1-----ATCAATGATTGGCAGCTGAGTCTGATCACA
@HWI-EAS293:2:16:251:1748#0/1-----ATCAATGATTGGCAGCTGAGTCTGATCACA
@HWI-EAS293:2:16:589:1162#0/1-----ATCAATGATTGGCAGCTGAGTCTGATCACA
@HWI-EAS293:2:16:628:626#0/1-----ATCAATGATTGGCAGCTGAGTCTGATCACA
@HWI-EAS293:2:16:956:1551#0/1-----ATCAATGATTGGCAGCTGAGTCTGATCACA
@HWI-EAS293:2:16:1242:635#0/1-----ATCAATGATTGGCAGCTGAGTCTGATCACA
@HWI-EAS293:2:16:1458:552#0/1-----ATCAATGATTGGCAGCTGAGTCTGATCACA
@HWI-EAS293:2:16:1690:1731#0/1-----ATCAATGATTGGCAGCTGAGTCTGATCACA
@HWI-EAS293:2:17:201:167#0/1-----ATCAATGATTGGCAGCTGAGTCTGATCACA
@HWI-EAS293:2:17:958:1841#0/1-----ATCAATGATTGGCAGCTGAGTCTGATCACA
@HWI-EAS293:2:17:1196:847#0/1-----ATCAATGATTGGCAGCTGAGTCTGATCACA
@HWI-EAS293:2:18:167:99#0/1-----ATCAATGATTGGCAGCTGAGTCTGATCACA
@HWI-EAS293:2:18:170:1725#0/1-----ATCAATGATTGGCAGCTGAGTCTGATCACA
@HWI-EAS293:2:18:512:1688#0/1-----ATCAATGATTGGCAGCTGAGTCTGATCACA
@HWI-EAS293:2:18:710:418#0/1-----ATCAATGATTGGCAGCTGAGTCTGATCACA
@HWI-EAS293:2:18:1035:932#0/1-----ATCAATGATTGGCAGCTGAGTCTGATCACA
@HWI-EAS293:2:18:1190:1617#0/1-----ATCAATGATTGGCAGCTGAGTCTGATCACA
@HWI-EAS293:2:18:1653:363#0/1-----ATCAATGATTGGCAGCTGAGTCTGATCACA
@HWI-EAS293:2:19:181:1846#0/1-----ATCAATGATTGGCAGCTGAGTCTGATCACA
@HWI-EAS293:2:1:1168:143#0/1-----TCAATGATTGGCAGCTGAGTCTGATCACA
@HWI-EAS293:2:1:1239:1306#0/1-----TCAATGATTGGCAGCTGAGTCTGATCACA
@HWI-EAS293:2:3:1404:189#0/1-----TCAATGATTGGCAGCTGAGTCTGATCACA
@HWI-EAS293:2:1:589:1256#0/1-----TCAATGATTGGCAGCTGAGTCTGATCACA
@HWI-EAS293:2:4:1604:1582#0/1-----TCAATGATTGGCAGCTGAGTCTGATCACA
@HWI-EAS293:2:5:855:1658#0/1-----TCAATGATTGGCAGCTGAGTCTGATCACA
@HWI-EAS293:2:6:905:300#0/1-----TCAATGATTGGCAGCTGAGTCTGATCACA
@HWI-EAS293:2:7:1526:712#0/1-----TCAATGATTGGCAGCTGAGTCTGATCACA
@HWI-EAS293:2:8:364:392#0/1-----TCAATGATTGGCAGCTGAGTCTGATCACA
@HWI-EAS293:2:8:1513:1455#0/1-----TCAATGATTGGCAGCTGAGTCTGATCACA
@HWI-EAS293:2:11:531:562#0/1-----TCAATGATTGGCAGCTGAGTCTGATCACA
@HWI-EAS293:2:13:1600:794#0/1-----TCAATGATTGGCAGCTGAGTCTGATCACA
@HWI-EAS293:2:14:1455:1785#0/1-----TCAATGATTGGCAGCTGAGTCTGATCACA
@HWI-EAS293:2:15:744:648#0/1-----TCAATGATTGGCAGCTGAGTCTGATCACA
@HWI-EAS293:2:18:595:1116#0/1-----TCAATGATTGGCAGCTGAGTCTGATCACA
@HWI-EAS293:2:18:1629:834#0/1-----TCAATGATTGGCAGCTGAGTCTGATCACA
@HWI-EAS293:2:1:1457:582#0/1-----CAATGATTGGCAGCTGAGTCTGATCACA
@HWI-EAS293:2:2:1198:1982#0/1-----CAATGATTGGCAGCTGAGTCTGATCACA
@HWI-EAS293:2:6:1289:235#0/1-----CAATGATTGGCAGCTGAGTCTGATCACA
@HWI-EAS293:2:9:1066:751#0/1-----CAATGATTGGCAGCTGAGTCTGATCACA
@HWI-EAS293:2:9:1077:1754#0/1-----CAATGATTGGCAGCTGAGTCTGATCACA
@HWI-EAS293:2:11:92:2033#0/1-----AAATGATTGGCAGCTGAGTCTGATCACA
@HWI-EAS293:2:1:1160:1217#0/1-----AAATGATTGGCAGCTGAGTCTGATCACA
@HWI-EAS293:2:1:1191:1702#0/1-----AAATGATTGGCAGCTGAGTCTGATCACA

```

@HWI-EAS293:2:1:1438:880#0/1 -----AAATGATTGGCAGCTCAGTCTGATCACA---  
@HWI-EAS293:2:2:85:281#0/1 -----AAATGATTGGCAGCTCAGTCTGATCACA---  
@HWI-EAS293:2:2:1208:636#0/1 -----AAATGATTGGCAGCTCAGTCTGATC---  
@HWI-EAS293:2:2:1261:1369#0/1 -----AAATGATTGGCAGCTCAGTCTGATCACA---  
@HWI-EAS293:2:2:1266:1044#0/1 -----AAATGATTGGCAGCTCAGTCTGATCACA---  
@HWI-EAS293:2:2:1278:1018#0/1 -----AAATGATTGGCAGCTCAGTCTGATCACA---  
@HWI-EAS293:2:2:1530:1971#0/1 -----AAATGATTGGCAGCTCAGTCTGATCACA---  
@HWI-EAS293:2:3:247:74#0/1 -----AAATGATTGGCAGCTCAGTCTGATCACA---  
@HWI-EAS293:2:3:523:83#0/1 -----AAATGATTGGCAGCTCAGTCTGATCACA---  
@HWI-EAS293:2:4:7:169#0/1 -----AAATGATTGGCAGCTCAGTCTGATCACA---  
@HWI-EAS293:2:4:27:1509#0/1 -----AAATGATTGGCAGCTCAGTCTGATCACA---  
@HWI-EAS293:2:4:32:485#0/1 -----AAATGATTGGCAGCTCAGTCTGATCACA---  
@HWI-EAS293:2:4:206:762#0/1 -----AAATGATTGGCAGCTCAGTCTGATCACA---  
@HWI-EAS293:2:4:962:1367#0/1 -----AAATGATTGGCAGCTCAGTCTGATCACA---  
@HWI-EAS293:2:4:1196:1581#0/1 -----AAATGATTGGCAGCTCAGTCTGATCACA---  
@HWI-EAS293:2:4:1209:1713#0/1 -----AAATGATTGGCAGCTCAGTCTGATCACA---  
@HWI-EAS293:2:4:1659:1039#0/1 -----AAATGATTGGCAGCTCAGTCTGATCACA---  
@HWI-EAS293:2:4:1740:1910#0/1 -----AAATGATTGGCAGCTCAGTCTGATCACA---  
@HWI-EAS293:2:5:84:678#0/1 -----AAATGATTGGCAGCTCAGTCTGATCACA---  
@HWI-EAS293:2:5:937:1492#0/1 -----AAATGATTGGCAGCTCAGTCTGATCACA---  
@HWI-EAS293:2:5:1091:91#0/1 -----AAATGATTGGCAGCTCAGTCTGATCACA---  
@HWI-EAS293:2:5:1463:920#0/1 -----AAATGATTGGCAGCTCAGTCTGATCACA---  
@HWI-EAS293:2:5:1466:104#0/1 -----AAATGATTGGCAGCTCAGTCTGATCACA---  
@HWI-EAS293:2:6:68:1173#0/1 -----AAATGATTGGCAGCTCAGTCTGATCACA---  
@HWI-EAS293:2:6:715:463#0/1 -----AAATGATTGGCAGCTCAGTCTGATCACA---  
@HWI-EAS293:2:6:1449:1061#0/1 -----AAATGATTGGCAGCTCAGTCTGATCACA---  
@HWI-EAS293:2:7:8:1951#0/1 -----AAATGATTGGCAGCTCAGTCTGATCACA---  
@HWI-EAS293:2:7:315:1546#0/1 -----AAATGATTGGCAGCTCAGTCTGATCACA---  
@HWI-EAS293:2:7:518:1956#0/1 -----AAATGATTGGCAGCTCAGTCTGATCACA---  
@HWI-EAS293:2:7:1434:1349#0/1 -----AAATGATTGGCAGCTCAGTCTGATCACA---  
@HWI-EAS293:2:8:586:1478#0/1 -----AAATGATTGGCAGCTCAGTCTGATCACA---  
@HWI-EAS293:2:8:662:194#0/1 -----AAATGATTGGCAGCTCAGTCTGATCACA---  
@HWI-EAS293:2:9:57:1356#0/1 -----AAATGATTGGCAGCTCAGTCTGATCACA---  
@HWI-EAS293:2:9:139:1470#0/1 -----AAATGATTGGCAGCTCAGTCTGATCACA---  
@HWI-EAS293:2:9:600:387#0/1 -----AAATGATTGGCAGCTCAGTCTGATCACA---  
@HWI-EAS293:2:9:725:1068#0/1 -----AAATGATTGGCAGCTCAGTCTGATCACA---  
@HWI-EAS293:2:9:788:1655#0/1 -----AAATGATTGGCAGCTCAGTCTGATCACA---  
@HWI-EAS293:2:9:1229:1285#0/1 -----AAATGATTGGCAGCTCAGTCTGATCACA---  
@HWI-EAS293:2:9:1346:371#0/1 -----AAATGATTGGCAGCTCAGTCTGATCACA---  
@HWI-EAS293:2:9:1403:899#0/1 -----AAATGATTGGCAGCTCAGTCTGATCACA---  
@HWI-EAS293:2:9:1593:886#0/1 -----AAATGATTGGCAGCTCAGTCTGATCACA---  
@HWI-EAS293:2:10:87:206#0/1 -----AAATGATTGGCAGCTCAGTCTGATCACA---  
@HWI-EAS293:2:10:673:695#0/1 -----AAATGATTGGCAGCTCAGTCTGATCACA---  
@HWI-EAS293:2:10:1018:709#0/1 -----AAATGATTGGCAGCTCAGTCTGATCACA---  
@HWI-EAS293:2:10:1056:925#0/1 -----AAATGATTGGCAGCTCAGTCTGATCACA---  
@HWI-EAS293:2:10:1108:1625#0/1 -----AAATGATTGGCAGCTCAGTCTGATCACA---  
@HWI-EAS293:2:10:1283:192#0/1 -----AAATGATTGGCAGCTCAGTCTGATCACA---  
@HWI-EAS293:2:11:135:1528#0/1 -----AAATGATTGGCAGCTCAGTCTGATCACA---  
@HWI-EAS293:2:12:207:574#0/1 -----AAATGATTGGCAGCTCAGTCTGATCACA---  
@HWI-EAS293:2:12:773:84#0/1 -----AAATGATTGGCAGCTCAGTCTGATCACA---  
@HWI-EAS293:2:12:1065:1916#0/1 -----AAATGATTGGCAGCTCAGTCTGATCACA---  
@HWI-EAS293:2:13:535:1481#0/1 -----AAATGATTGGCAGCTCAGTCTGATCACA---  
@HWI-EAS293:2:13:548:1104#0/1 -----AAATGATTGGCAGCTCAGTCTGATCACA---  
@HWI-EAS293:2:13:1615:783#0/1 -----AAATGATTGGCAGCTCAGTCTGATCACA---  
@HWI-EAS293:2:13:1739:1815#0/1 -----AAATGATTGGCAGCTCAGTCTGATCACA---  
@HWI-EAS293:2:15:213:1756#0/1 -----AAATGATTGGCAGCTCAGTCTGATCACA---  
@HWI-EAS293:2:15:225:1853#0/1 -----AAATGATTGGCAGCTCAGTCTGATCACA---  
@HWI-EAS293:2:15:421:1716#0/1 -----AAATGATTGGCAGCTCAGTCTGATCACA---  
@HWI-EAS293:2:15:1079:512#0/1 -----AAATGATTGGCAGCTCAGTCTGATCACA---  
@HWI-EAS293:2:15:1674:713#0/1 -----AAATGATTGGCAGCTCAGTCTGATCACA---  
@HWI-EAS293:2:16:453:1187#0/1 -----AAATGATTGGCAGCTCAGTCTGATCACA---  
@HWI-EAS293:2:16:733:489#0/1 -----AAATGATTGGCAGCTCAGTCTGATCACA---  
@HWI-EAS293:2:16:1690:22#0/1 -----AAATGATTGGCAGCTCAGTCTGATCACA---  
@HWI-EAS293:2:16:1699:958#0/1 -----AAATGATTGGCAGCTCAGTCTGATCACA---  
@HWI-EAS293:2:16:1701:352#0/1 -----AAATGATTGGCAGCTCAGTCTGATCACA---  
@HWI-EAS293:2:17:520:1318#0/1 -----AAATGATTGGCAGCTCAGTCTGATCACA---  
@HWI-EAS293:2:17:855:525#0/1 -----AAATGATTGGCAGCTCAGTCTGATCACA---  
@HWI-EAS293:2:17:1474:1302#0/1 -----AAATGATTGGCAGCTCAGTCTGATCACA---  
@HWI-EAS293:2:18:1035:1369#0/1 -----AAATGATTGGCAGCTCAGTCTGATCACA---  
@HWI-EAS293:2:18:1407:936#0/1 -----AAATGATTGGCAGCTCAGTCTGATCACA---  
@HWI-EAS293:2:8:1120:218#0/1 -----ATGATTGGCAGCTCAGTCTGATCACA---  
@HWI-EAS293:2:13:861:690#0/1 -----ATGATTGGCAGCTCAGTCTGATCACA---







iDNA 3600-3800 in vitro

ctaaagctaaatattggcagagaccyctatagcgaacaagtacatgtagatgaaagaatgaaagaactttgaaagaagtagtgaatattgtgaaaggaaggccatttgcacacatggttttggccctctgctccttgytgggtaagggaatctcgcatttccactgggccaagcatcagtttgggtggc  
@HHI-EAS29331149:71280/1  
-----GMAAGACCTT-GMAAGAGAGTGAAMAAGT-----  
@HHI-EAS29331149:72380/1  
-----GMAAGACCTT-GMAAGAGAGTGAAMAAGT-----  
@HHI-EAS29331143:42510/1  
-----GMAAGACCTT-GMAAGAGAGTGAAMAAGT-----  
@HHI-EAS29331141:20280/1  
-----GMAAGACCTT-GMAAGAGAGTGAAMAAGT-----  
@HHI-EAS29331140:12360/1  
-----AAGAGTGAAGAAGTGAAGAAGTGAAGAAGT-----  
@HHI-EAS29331138:114180/1  
AGTGTGGAAGAAGTGAAGAAGTGAAGAAGT-----  
@HHI-EAS29331124:45880/1  
AGTGTGGAAGAAGTGAAGAAGTGAAGAAGT-----  
@HHI-EAS29331148:163180/1  
-----GATGGAAGTGAAGAAGTGAAGAAGT-----  
@HHI-EAS29331120:49780/1  
-----GGAAGTGAAGAAGTGAAGAAGT-----  
@HHI-EAS29331116:28880/1  
AGTGTGGAAGAAGTGAAGAAGTGAAGAAGT-----  
@HHI-EAS29331150:69380/1  
-----GATGGAAGTGAAGAAGTGAAGAAGT-----  
@HHI-EAS29331129:26580/1  
-----GATGGAAGTGAAGAAGTGAAGAAGT-----  
@HHI-EAS29331130:52480/1  
-----GATGGAAGTGAAGAAGTGAAGAAGT-----  
@HHI-EAS2933118:68480/1  
-----GATGGAAGTGAAGAAGTGAAGAAGT-----  
@HHI-EAS2933118:66280/1  
AGTGTGGAAGAAGTGAAGAAGT-----  
@HHI-EAS29331150:196880/1  
-----GGAAGTGAAGAAGT-----  
@HHI-EAS29331149:35380/1  
AGTGTGGAAGAAGTGAAGAAGT-----  
@HHI-EAS29331148:120880/1  
AGTGTGGAAGAAGTGAAGAAGT-----  
@HHI-EAS29331146:98080/1  
AGTGTGGAAGAAGTGAAGAAGT-----  
@HHI-EAS29331145:125880/1  
-----GGAAGTGAAGAAGT-----  
@HHI-EAS29331144:14780/1  
-----GGAAGTGAAGAAGT-----  
@HHI-EAS29331141:63680/1  
AGTGTGGAAGAAGTGAAGAAGT-----  
@HHI-EAS29331138:165880/1  
AGTGTGGAAGAAGTGAAGAAGT-----  
@HHI-EAS29331134:109880/1  
AGTGTGGAAGAAGTGAAGAAGT-----  
@HHI-EAS29331134:106180/1  
-----GGAAGTGAAGAAGT-----  
@HHI-EAS29331131:114680/1  
AGTGTGGAAGAAGTGAAGAAGT-----  
@HHI-EAS29331131:112280/1  
AGTGTGGAAGAAGTGAAGAAGT-----  
@HHI-EAS29331130:68780/1  
AGTGTGGAAGAAGTGAAGAAGT-----  
@HHI-EAS29331130:195780/1  
-----GATGGAAGTGAAGAAGT-----  
@HHI-EAS29331127:14180/1  
-----GATGGAAGTGAAGAAGT-----  
@HHI-EAS29331125:22680/1  
-----GATGGAAGTGAAGAAGT-----  
@HHI-EAS29331124:186380/1  
AGTGTGGAAGAAGTGAAGAAGT-----  
@HHI-EAS29331120:80880/1  
AGTGTGGAAGAAGTGAAGAAGT-----  
@HHI-EAS29331120:120480/1  
AGTGTGGAAGAAGTGAAGAAGT-----  
@HHI-EAS29331119:173880/1  
AGTGTGGAAGAAGTGAAGAAGT-----  
@HHI-EAS29331115:50880/1  
AGTGTGGAAGAAGTGAAGAAGT-----  
@HHI-EAS29331112:130780/1  
AGTGTGGAAGAAGTGAAGAAGT-----  
@HHI-EAS29331111:107680/1  
AGTGTGGAAGAAGTGAAGAAGT-----  
@HHI-EAS29331143:84180/1  
-----GTGATGGAAGT-----  
@HHI-EAS29331131:128880/1  
-----CGATGCGCAACAGAC-----  
@HHI-EAS29331127:140280/1  
-----ATTGCGCGAGACCGATAGCGAC-----  
@HHI-EAS29331148:178680/1  
-----GAGAGACCGATAGCGAC-----  
@HHI-EAS29331124:184880/1  
-----ATTGCGCGAGACCGATAGCGAC-----  
@HHI-EAS29331122:183880/1  
-----ACCGATAGCGAC-----  
@HHI-EAS29331110:32980/1  
-----  
@HHI-EAS29331119:23380/1  
-----ACGTGAAATTTGTAAGGAGGGCATTGATC-----  
@HHI-EAS29331139:5180/1  
-----TGTGTAAGGAGAGGGC-----  
@HHI-EAS29331127:198780/1  
-----ACGTGAAATTTGTAAGGAGGGC-----  
@HHI-EAS29331122:13980/1  
-----ACGTGAAATTTGTAAGGAGGGC-----  
@HHI-EAS29331118:93780/1  
-----ACGTGAAATTTGTAAGGAGGGC-----  
@HHI-EAS29331146:10280/1  
-----GMAAGAGTGAAGAAGTGAAGAAGTGAAGAAGT-----  
@HHI-EAS29331133:11280/1  
-----GMAAAGTGAAGAAGTGAAGAAGTGAAGAAGT-----  
@HHI-EAS29331138:65280/1  
-----GMAATTTGTAAGGAG-----



rDNA 5900-6000 *in vitro*

```
rDNA 5900-6000 in vitro
@HWI-EAS293:3:1:30:671#0/1 -----AAGGGGGGCTCATGGAGAACAG-----
@HWI-EAS293:3:1:25:1554#0/1 -----AAGGGGGGCTCATGGAGAACAG-----
@HWI-EAS293:3:1:23:1620#0/1 -----AAGGGGGGCTCATGGAGAACAG-----
@HWI-EAS293:3:1:14:103#0/1 -----AAGGGGGGCTCATGGAGAACAG-----
@HWI-EAS293:3:1:20:1936#0/1 -----AAGGGGGGCTCATGGAGAACAG-----
@HWI-EAS293:3:1:20:1062#0/1 -----AAGGGGGGCTCATGGAGAACAG-----
@HWI-EAS293:3:1:18:1589#0/1 -----AAGGGGGGCTCATGGAGAACAG-----
@HWI-EAS293:3:1:8:1585#0/1 -----AAGGGGGGCTCATGGAGAACAG-----
@HWI-EAS293:3:1:8:1353#0/1 -----AAGGGGGGCTCATGGAGAACAG-----
@HWI-EAS293:3:1:8:102#0/1 -----AAGGGGGGCTCATGGAGAACAG-----
@HWI-EAS293:3:1:50:1843#0/1 -----AAGGGGGGCTCATGGAGAACAG-----
@HWI-EAS293:3:1:46:1079#0/1 -----AACGCAGATCTCTAAGGGGGGCTCATGGAGAAC-----
@HWI-EAS293:3:1:44:1715#0/1 -----AAGGGGGGCTCATGGAGAACAG-----
@HWI-EAS293:3:1:43:286#0/1 -----AAGGGGGGCTCATGGAGAACAG-----
@HWI-EAS293:3:1:43:1481#0/1 -----AAGGGGGGCTCATGGAGAACAG-----
@HWI-EAS293:3:1:42:1559#0/1 -----AAGGGGGGCTCATGGAGAACAG-----
@HWI-EAS293:3:1:38:1799#0/1 -----AAGGGGGGCTCATGGAGAACAG-----
@HWI-EAS293:3:1:36:2041#0/1 -----AAGGGGGGCTCATGGAGAACAG-----
@HWI-EAS293:3:1:36:1122#0/1 -----GGGGGGCTCATGGAGAAC-----
@HWI-EAS293:3:1:35:1685#0/1 -----AAGGGGGGCTCATGGAGAACAG-----
@HWI-EAS293:3:1:34:1802#0/1 -----AAGGGGGGCTCATGGAGAACAG-----
@HWI-EAS293:3:1:34:1194#0/1 -----AAGGGGGGCTCATGGAGAACAG-----
@HWI-EAS293:3:1:33:1042#0/1 -----AAGGGGGGCTCATGGAGAACAG-----
@HWI-EAS293:3:1:31:809#0/1 -----AAGGGGGGCTCATGGAGAACAG-----
@HWI-EAS293:3:1:31:769#0/1 -----AAGGGGGGCTCATGGAGAACAG-----
@HWI-EAS293:3:1:31:1226#0/1 -----AAGGGGGGCTCATGGAGAACAG-----
@HWI-EAS293:3:1:30:1768#0/1 -----AAGGGGGGCTCATGGAGAACAG-----
@HWI-EAS293:3:1:26:774#0/1 -----AAGGGGGGCTCATGGAGAACAG-----
@HWI-EAS293:3:1:23:1799#0/1 -----AAGGGGGGCTCATGGAGAACAG-----
@HWI-EAS293:3:1:22:842#0/1 -----AAGGGGGGCTCATGGAGAACAG-----
@HWI-EAS293:3:1:22:1042#0/1 -----AAGGGGGGCTCATGGAGAACAG-----
@HWI-EAS293:3:1:20:1481#0/1 -----AAGGGGGGCTCATGGAGAACAG-----
@HWI-EAS293:3:1:19:1199#0/1 -----AAGGGGGGCTCATGGAGAACAG-----
@HWI-EAS293:3:1:18:1985#0/1 -----AAGGGGGGCTCATGGAGAACAG-----
@HWI-EAS293:3:1:18:1593#0/1 -----AAGGGGGGCTCATGGAGAACAG-----
@HWI-EAS293:3:1:16:771#0/1 -----AAGGGGGGCTCATGGAGAACAG-----
@HWI-EAS293:3:1:16:209#0/1 -----AAGGGGGGCTCATGGAGAACAG-----
@HWI-EAS293:3:1:15:825#0/1 -----AAGGGGGGCTCATGGAGAACAG-----
@HWI-EAS293:3:1:14:49#0/1 -----AAGGGGGGCTCATGGAGAACAG-----
@HWI-EAS293:3:1:13:1348#0/1 -----AAGGGGGGCTCATGGAGAACAG-----
@HWI-EAS293:3:1:10:620#0/1 -----AAGGGGGGCTCATGGAGAACAG-----
@HWI-EAS293:3:1:10:1265#0/1 -----AAGGGGGGCTCATGGAGAACAG-----
@HWI-EAS293:3:1:46:834#0/1 -----AGATGTCTTAAGGGGGGCTC-----
@HWI-EAS293:3:1:23:1674#0/1 -----AGATGTCTTAAGGGGGGCTC-----
@HWI-EAS293:3:1:21:1444#0/1 -----AGATGTCTTAAGGGGGGCTC-----
@HWI-EAS293:3:1:15:1821#0/1 -----GTCCCAAGGGGGGCTC-----
```
